# Supplementary material for: Role of Mixed-Species Stands in Attenuating the Vulnerability of Boreal Forests to Climate Change and Insect Epidemics
Source: Frontiers journal article supplement (doi:10.3389/fpls.2021.658880), 2021-04-29
Supplement: Data_Sheet_1.PDF [file Data_Sheet_1.PDF]

## Supplementary Material

### 1 Supplementary Figures and Tables

#### 1.1 Supplementary Figures

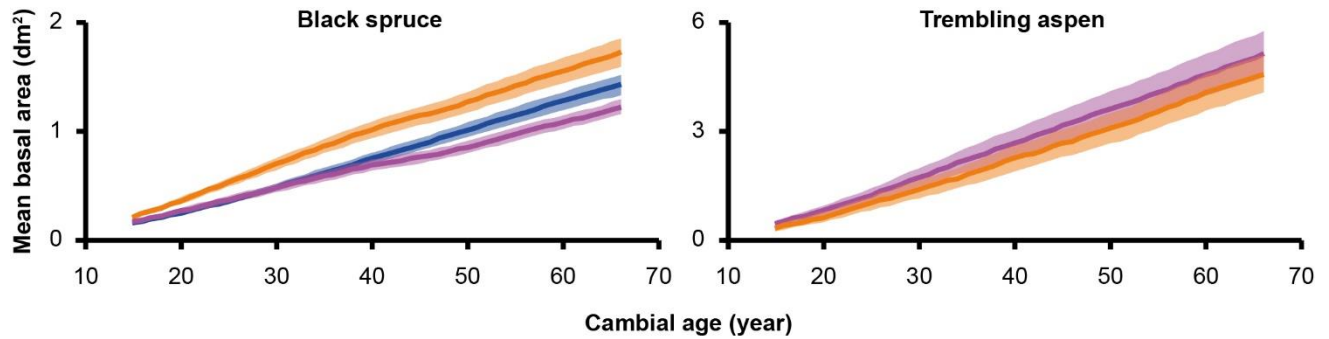

**Supplementary Figure 1.** Mean basal area of black spruce and trembling aspen according to cambial age in pure black spruce stands (blue curve), mixed stands (orange curves), or pure trembling aspen stands (purple curves). The colored areas represent  $\pm 1$  standard errors of the mean.

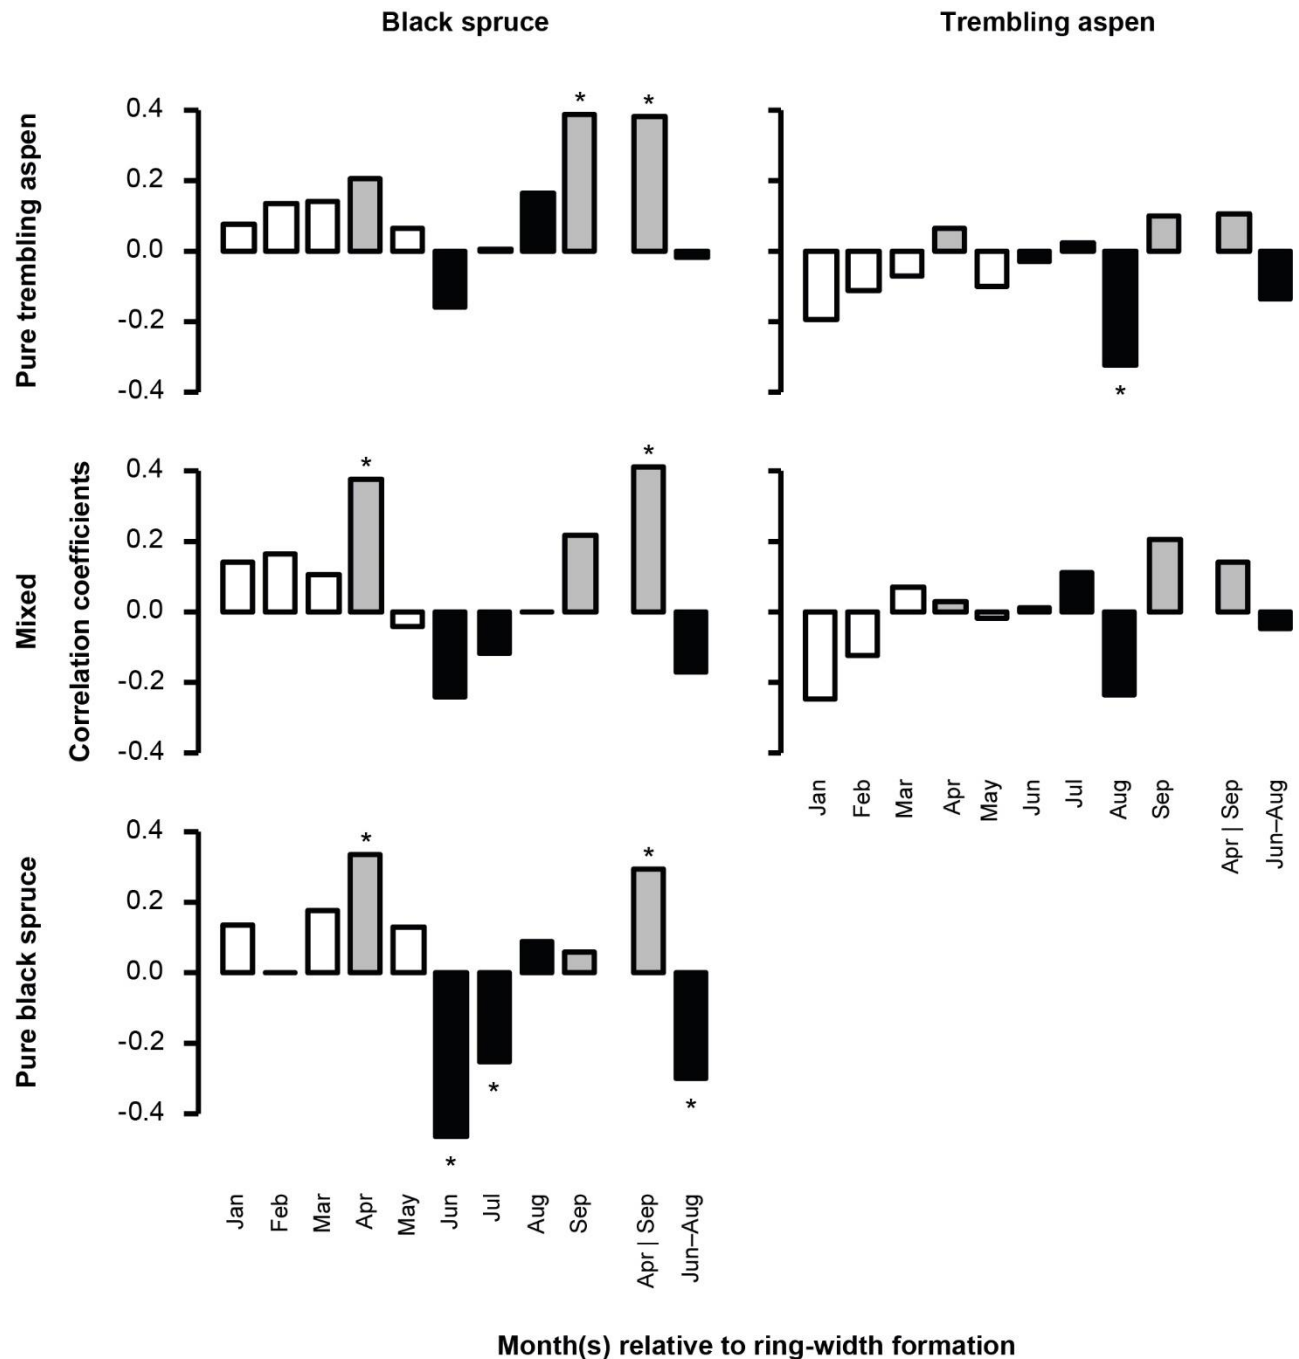

**Supplementary Figure 2.** Correlation between monthly minimum temperature and basal area increment chronologies of black spruce and trembling aspen in pure and mixed stands from 1950–2005. April and September, important months for growing season length, are in gray; June–August, determining summer conditions, are in black. Stars represent significant correlation coefficients ( $p < 0.05$ ). In each analysis, a 9-month window from January to September, and the mean values for April and September, and June–August of the year of ring formation were evaluated.

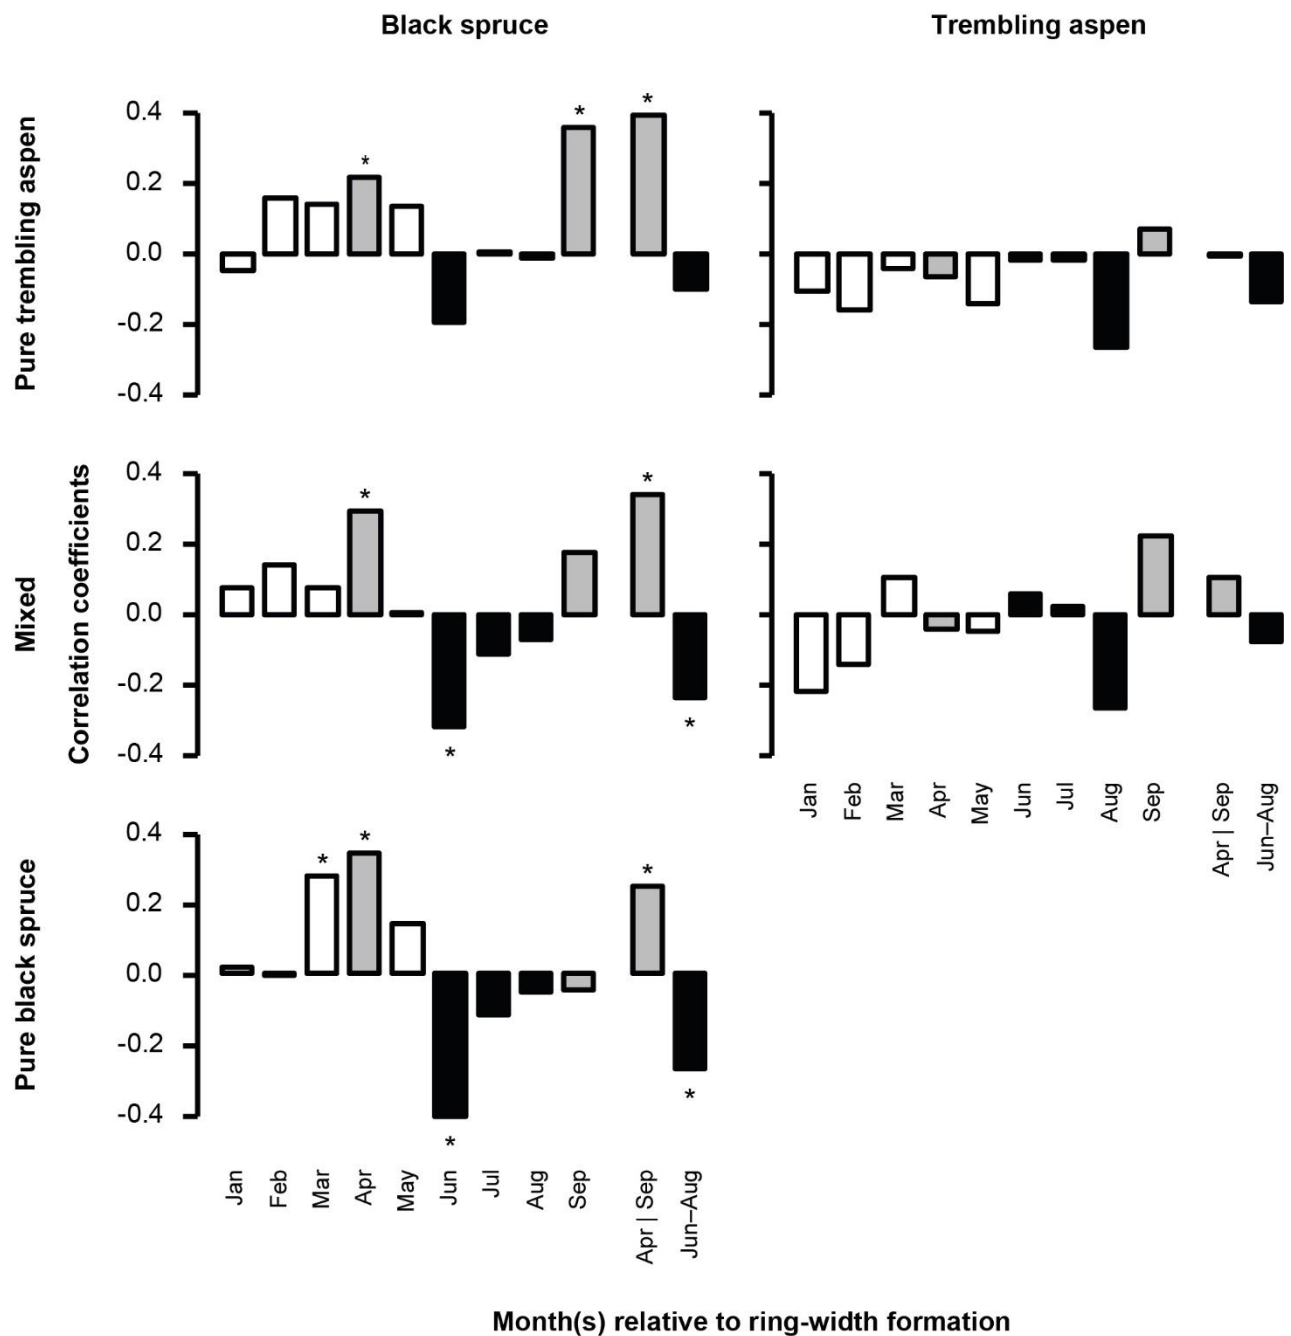

**Supplementary Figure 3.** Correlation between monthly maximum temperature and basal area increment chronologies of black spruce and trembling aspen in pure and mixed stands from 1950–2005. April and September, important months for growing season length, are in gray; June–August, determining summer conditions, are in black. Stars represent significant correlation coefficients ( $p < 0.05$ ). In each analysis, a 9-month window from January to September, and the mean values for April and September, and June–August of the year of ring formation were evaluated.

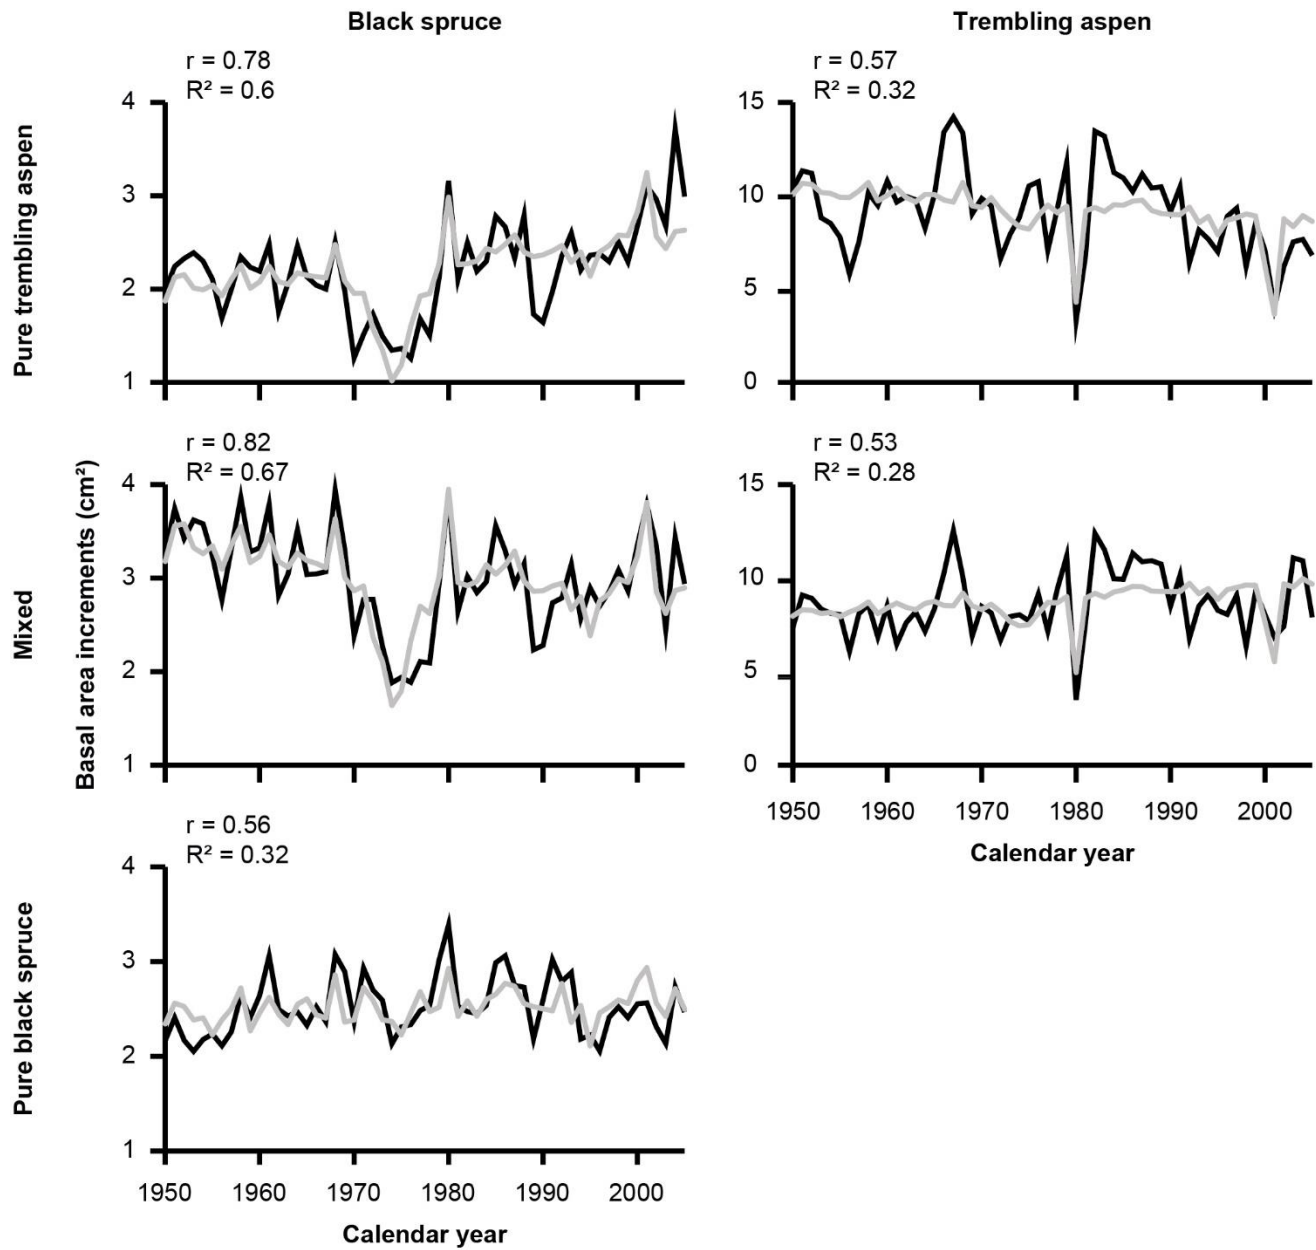

**Supplementary Figure 4.** Observed versus predicted basal area increment time series (black and gray curves, respectively) of black spruce and trembling aspen in pure and mixed stands. Predicted values were obtained with multiple linear Bayesian models.

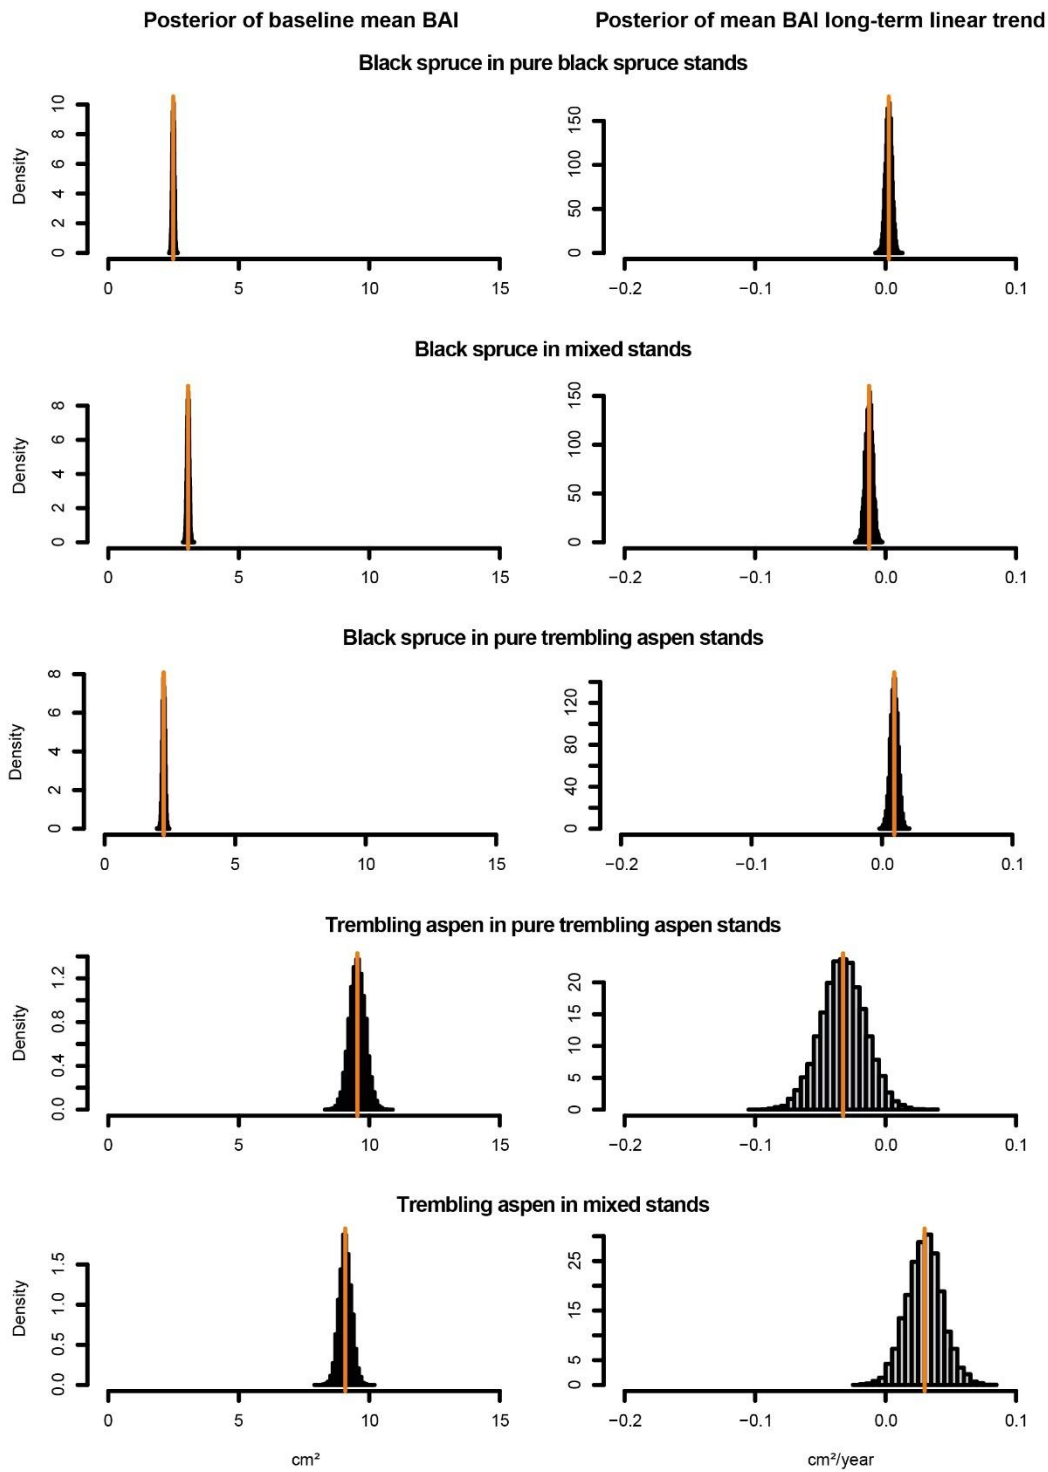

**Supplementary Figure 5.** Posterior distributions for parameters of the Bayesian models (baseline mean basal area increments and mean BAI long-term linear trend) with chronologies for black spruce and trembling aspen in mixed and pure stands (orange line = mean).

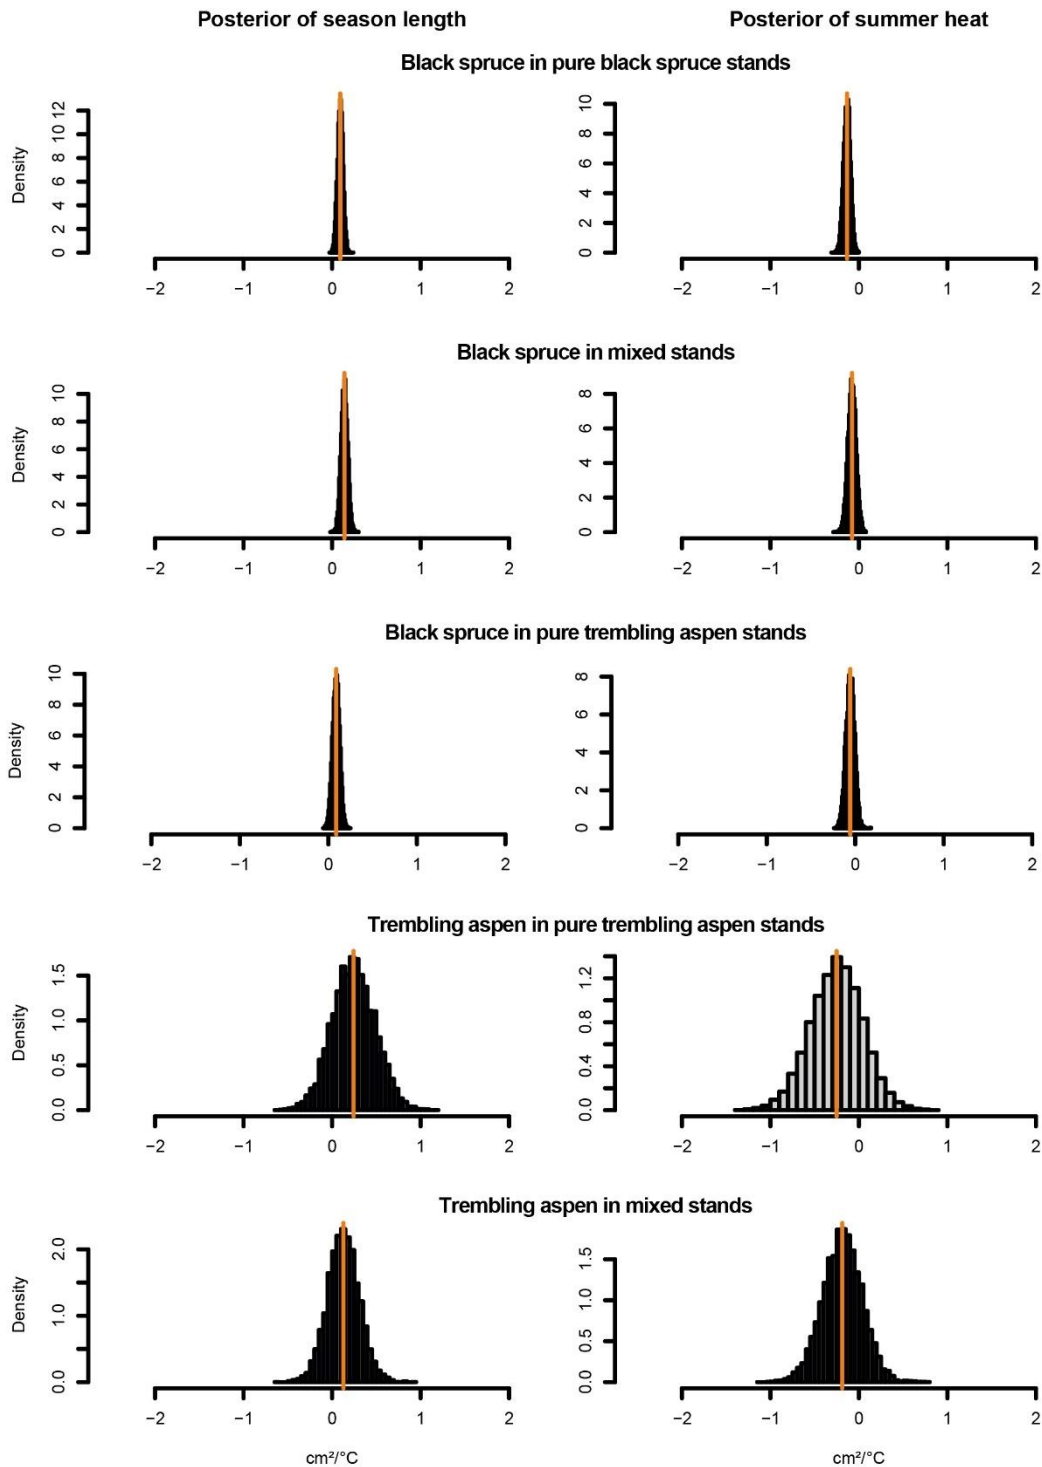

**Supplementary Figure 6.** Posterior distributions for parameters of the Bayesian models (growing season length and summer heat stress) with chronologies for black spruce and trembling aspen in mixed and pure stands (orange line = mean).

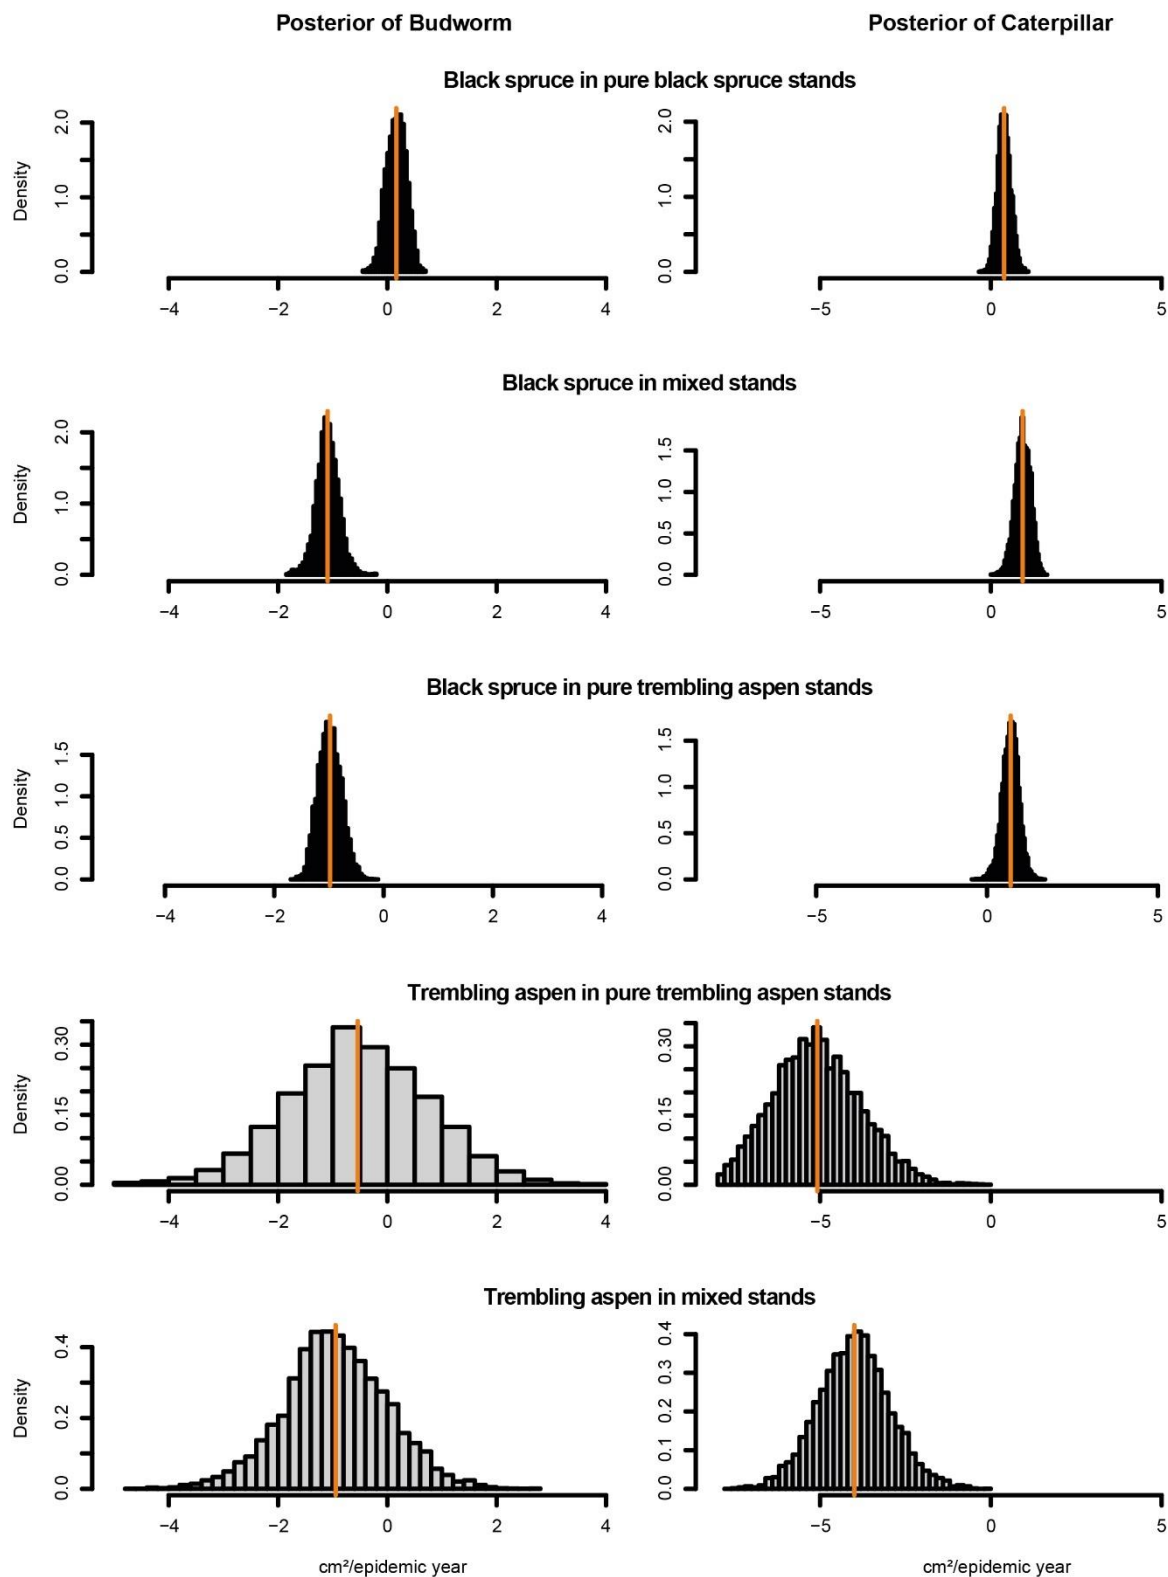

**Supplementary Figure 7.** Posterior distributions for parameters of the Bayesian models (spruce budworm and forest tent caterpillar epidemics) with chronologies for black spruce and trembling aspen in mixed and pure stands (orange line = mean).

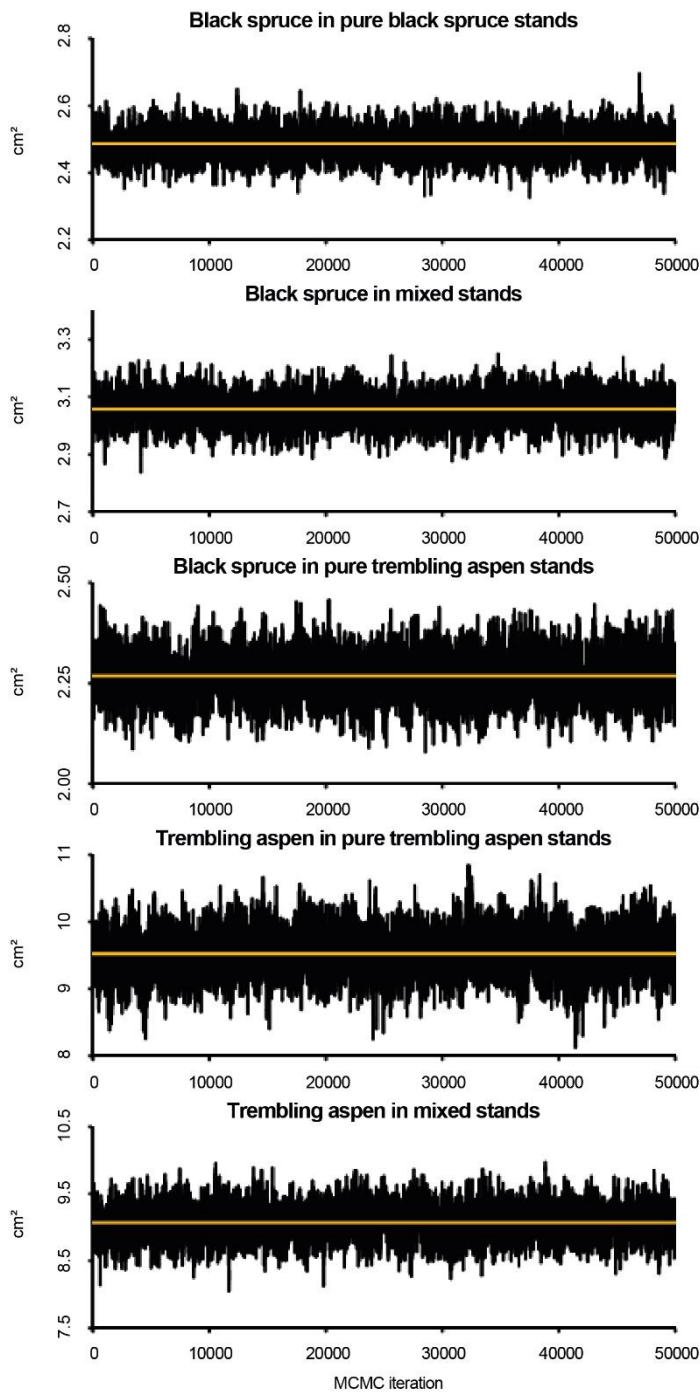

**Supplementary Figure 8.** Baseline mean basal area increment chain values for parameters over retained Markov Chain Monte Carlo (MCMC) iterations with chronologies for black spruce and trembling aspen in mixed and pure stands (orange line = mean).



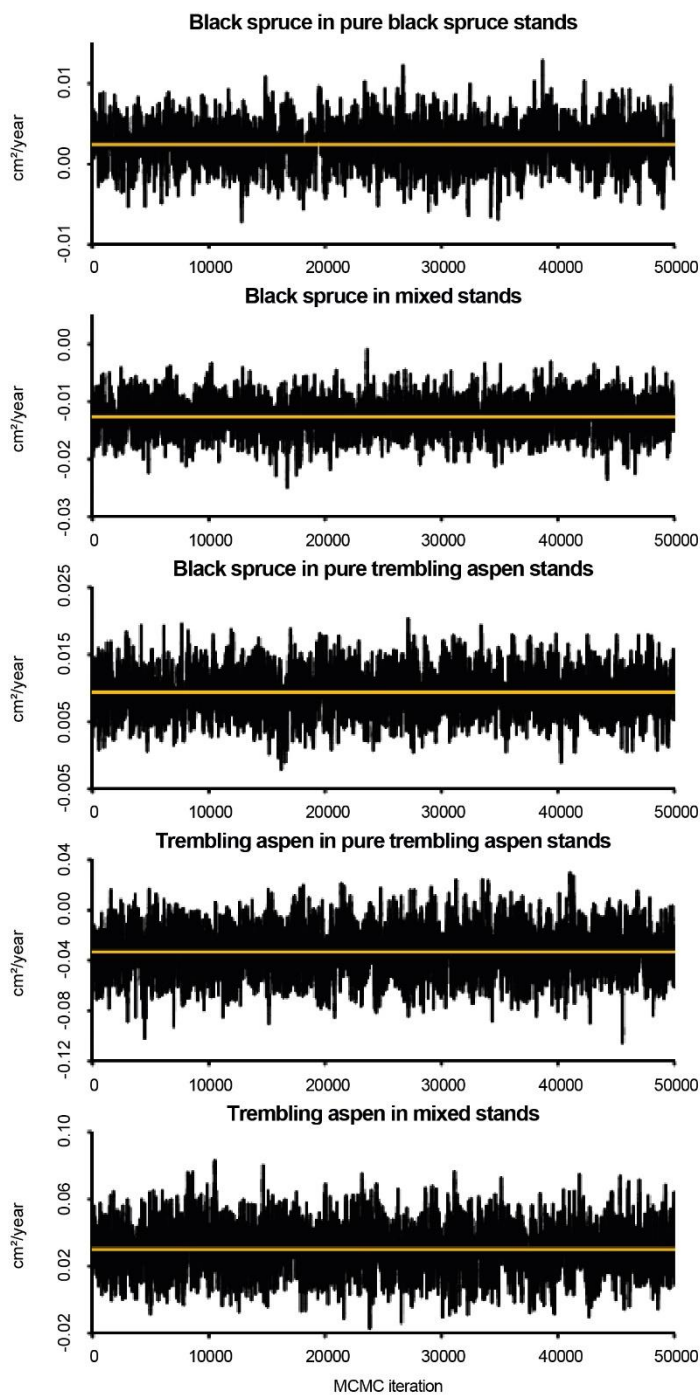

**Supplementary Figure 9.** Mean basal area increment long-term linear trend chain values for parameters over retained Markov Chain Monte Carlo (MCMC) iterations with chronologies for black spruce and trembling aspen in mixed and pure stands (orange line = mean).

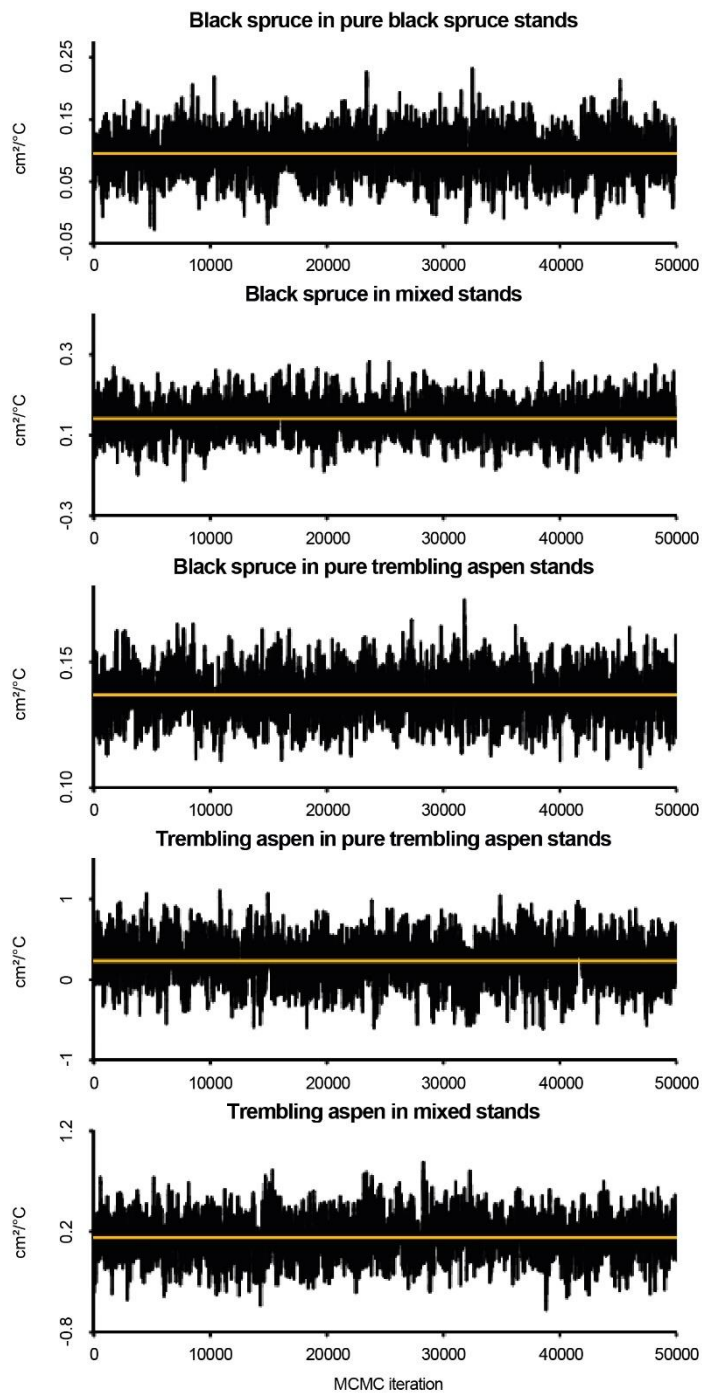

**Supplementary Figure 10.** Growing season length chain values for parameters over retained Markov Chain Monte Carlo (MCMC) iterations with chronologies for black spruce and trembling aspen in mixed and pure stands (orange line = mean).

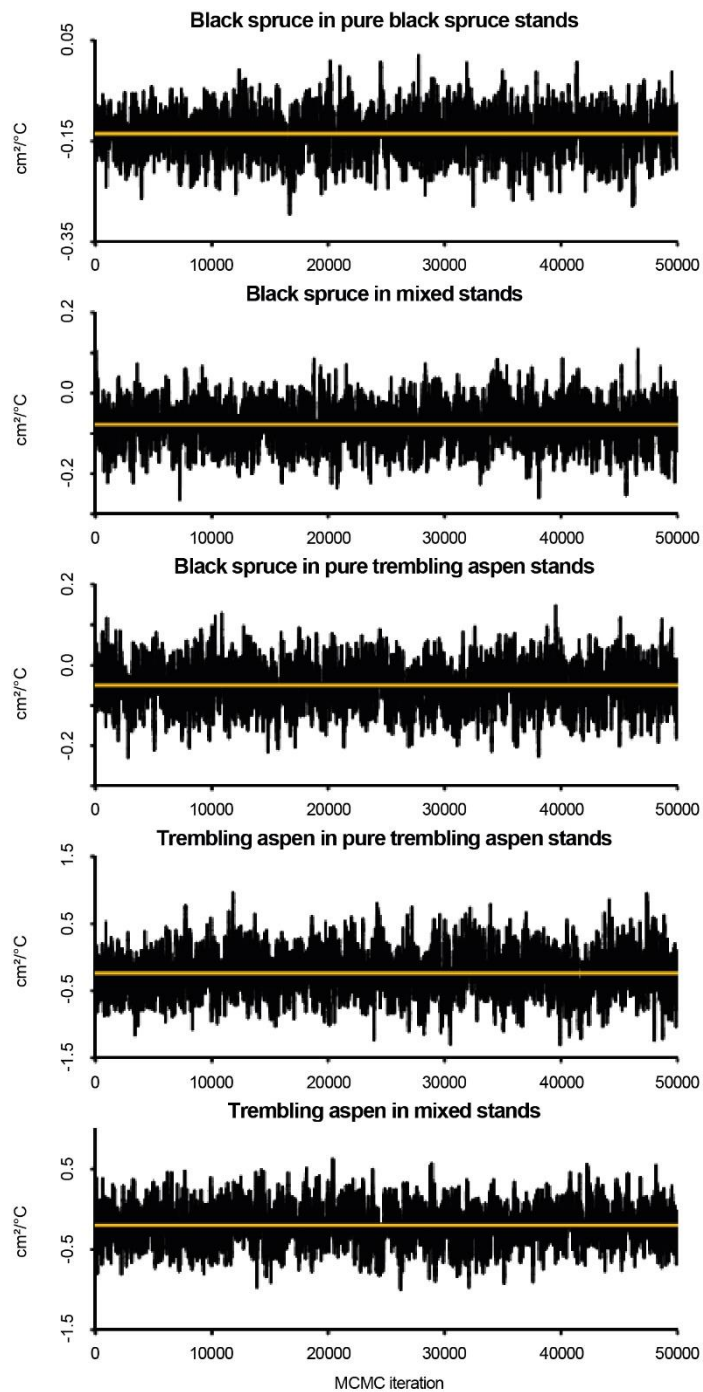

**Supplementary Figure 11.** Summer heat stress chain values for parameters over retained Markov Chain Monte Carlo (MCMC) iterations with chronologies for black spruce and trembling aspen in mixed and pure stands (orange line = mean).

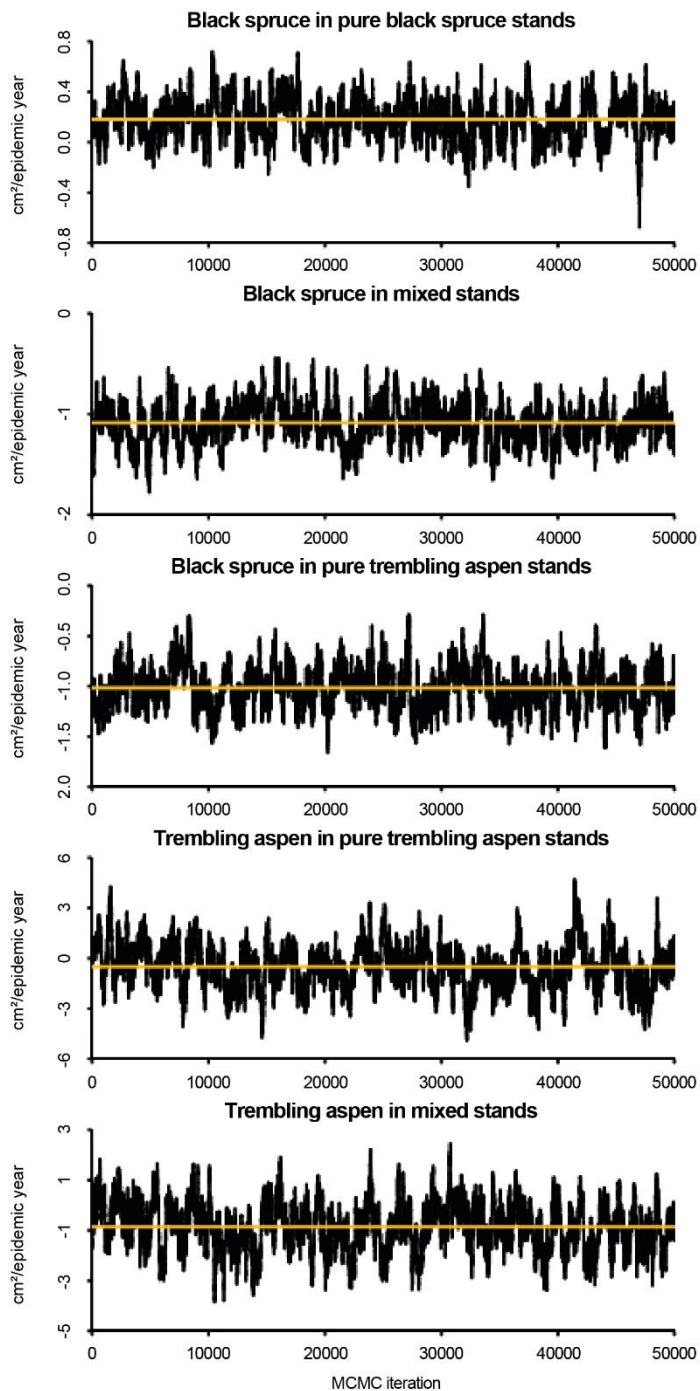

**Supplementary Figure 12.** Spruce budworm epidemic chain values for parameters over retained Markov Chain Monte Carlo (MCMC) iterations with chronologies for black spruce and trembling aspen in mixed and pure stands (orange line = mean).

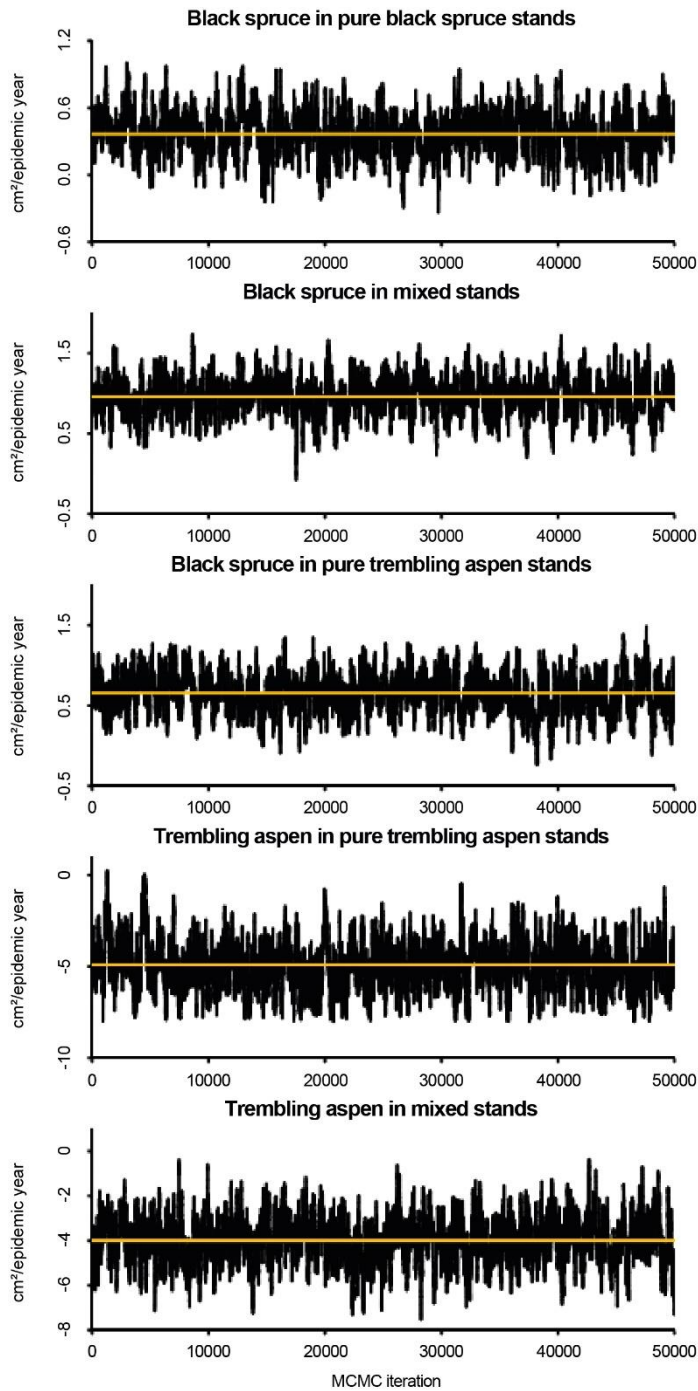

**Supplementary Figure 13.** Forest tent caterpillar epidemic chain values for parameters over retained Markov Chain Monte Carlo (MCMC) iterations with chronologies for black spruce and trembling aspen in mixed and pure stands (orange line = mean).

## 1.2 Supplementary Tables

**Supplementary Table 1.** Ranked years of increases and decreases in mean basal area increments from one year to the next (i.e., first-differenced chronologies) for black spruce and trembling aspen in pure and mixed stands from 1950–2005. Blue areas represent the spruce budworm epidemic centered around 1974 ( $\pm 4$  yrs), whereas gray areas represent forest tent caterpillar epidemics of 1980 and 2000–2001.

|           |    | Black spruce      |       |                      | Trembling aspen      |       |
|-----------|----|-------------------|-------|----------------------|----------------------|-------|
|           |    | Pure black spruce | Mixed | Pure trembling aspen | Pure trembling aspen | Mixed |
| Increases | 1  | 1968              | 1979  | 1980                 | 1981                 | 1981  |
|           | 2  | 2004              | 2004  | 1979                 | 1982                 | 1982  |
|           | 3  | 1971              | 1980  | 2004                 | 2002                 | 2003  |
|           | 4  | 1979              | 1968  | 1977                 | 1999                 | 1999  |
|           | 5  | 1990              | 1985  | 1968                 | 1958                 | 1957  |
|           | 6  | 1985              | 1991  | 1985                 | 1966                 | 1978  |
|           | 7  | 1997              | 1957  | 1991                 | 1978                 | 1993  |
|           | 8  | 1958              | 2000  | 1971                 | 1957                 | 1960  |
|           | 9  | 1991              | 1958  | 1988                 | 1993                 | 1951  |
|           | 10 | 1961              | 1971  | 1992                 | 1996                 | 1966  |
| Decreases | 1  | 1981              | 1981  | 1989                 | 1980                 | 1980  |
|           | 2  | 1994              | 1989  | 1970                 | 2001                 | 1992  |
|           | 3  | 1989              | 1970  | 1981                 | 1992                 | 1969  |
|           | 4  | 1962              | 2003  | 1962                 | 1977                 | 1998  |
|           | 5  | 1970              | 1962  | 1969                 | 1998                 | 2005  |
|           | 6  | 1974              | 1994  | 1956                 | 1969                 | 1956  |
|           | 7  | 1987              | 1973  | 2005                 | 1972                 | 1961  |
|           | 8  | 1952              | 1974  | 1994                 | 1956                 | 1977  |
|           | 9  | 2002              | 1969  | 1973                 | 1953                 | 1990  |
|           | 10 | 2005              | 1959  | 1965                 | 2000                 | 1959  |

**Supplementary Table 2.** Prior ranges for the parameters of the models explaining BAI.  $BAI_{t,y} = \alpha\_Baseline_y + Trend_t \alpha\_Tr_y + SeasonLength_t \alpha\_SL_y + SummerHeat_t \alpha\_SH_y + Budworm_t \alpha\_SB_y + Caterpillar_t \alpha\_TC_y$ .

| Parameter                                     | Low boundary | High boundary |
|-----------------------------------------------|--------------|---------------|
| $\alpha\_Baseline$ (cm <sup>2</sup> )         | 0            | 20            |
| $\alpha\_Tr$ (cm <sup>2</sup> /year)          | -0.2         | 0.2           |
| $\alpha\_SL$ (cm <sup>2</sup> /°C)            | -3           | 3             |
| $\alpha\_SH$ (cm <sup>2</sup> /°C)            | -3           | 3             |
| $\alpha\_SB$ (cm <sup>2</sup> /epidemic year) | -5           | 5             |
| $\alpha\_TC$ (cm <sup>2</sup> /epidemic year) | -8           | 8             |
| $\sigma$ (cm <sup>2</sup> )                   | 0            | 10            |
